# Supplementary material
Source: bioRxiv or medRxiv preprint supplement (https://www.biorxiv.org/highwire/filestream/17340/field_highwire_adjunct_files/0/062950-1.pdf)
Supplement: Supplementary file [file 062950-1.pdf]

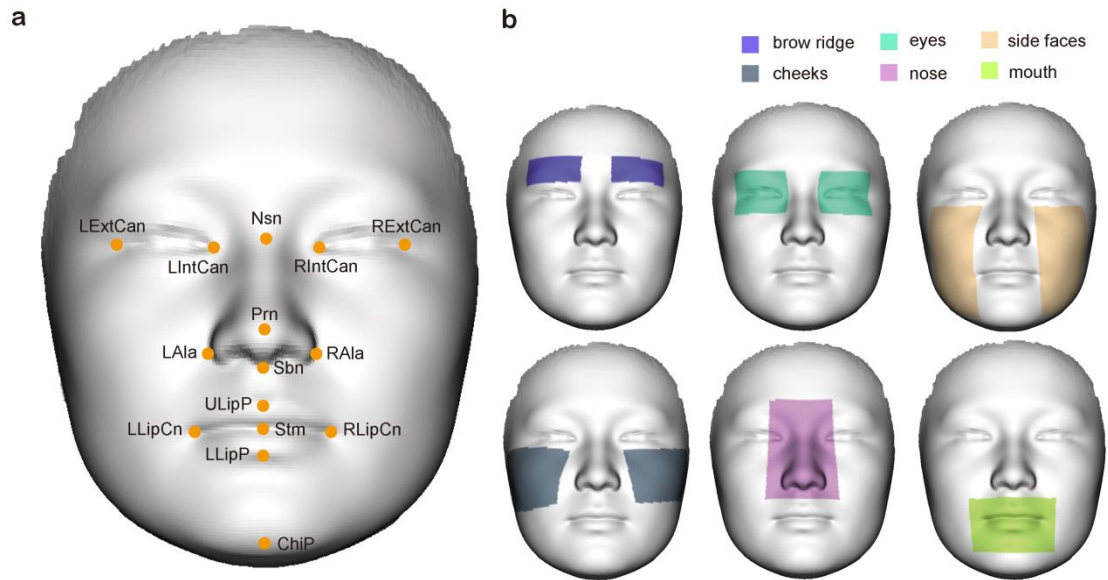

**Supplementary Figure 1 | The 15 landmarks and facial features extracted from 3D images. (a) fifteen landmarks. (b) six facial features used to analysis.**

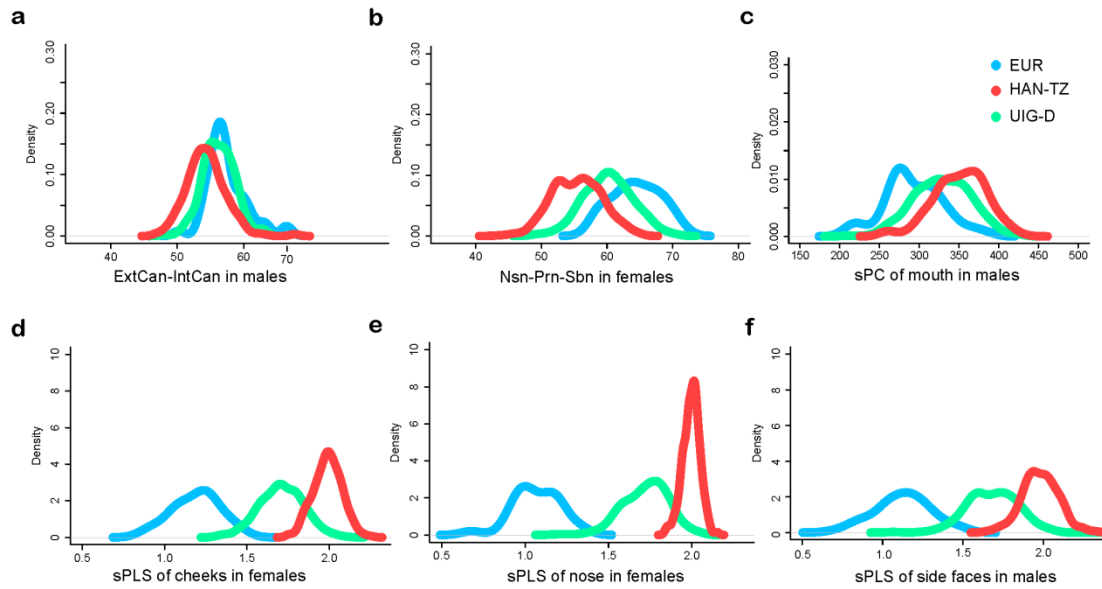

**Supplementary Figure 2 | Few candidate phenotype examples show strong divergence between EUR and HAN-TZ with UIG-D covering in-between.** (a) distance between ExtCan and IntCan in males, (b) distance of Nsn-Prn-Sbn in females, (c) sPC of mouth in males, (d) sPLS of cheek in females, (e) nasal sPLS in females, (f) sPLS of side faces in males.

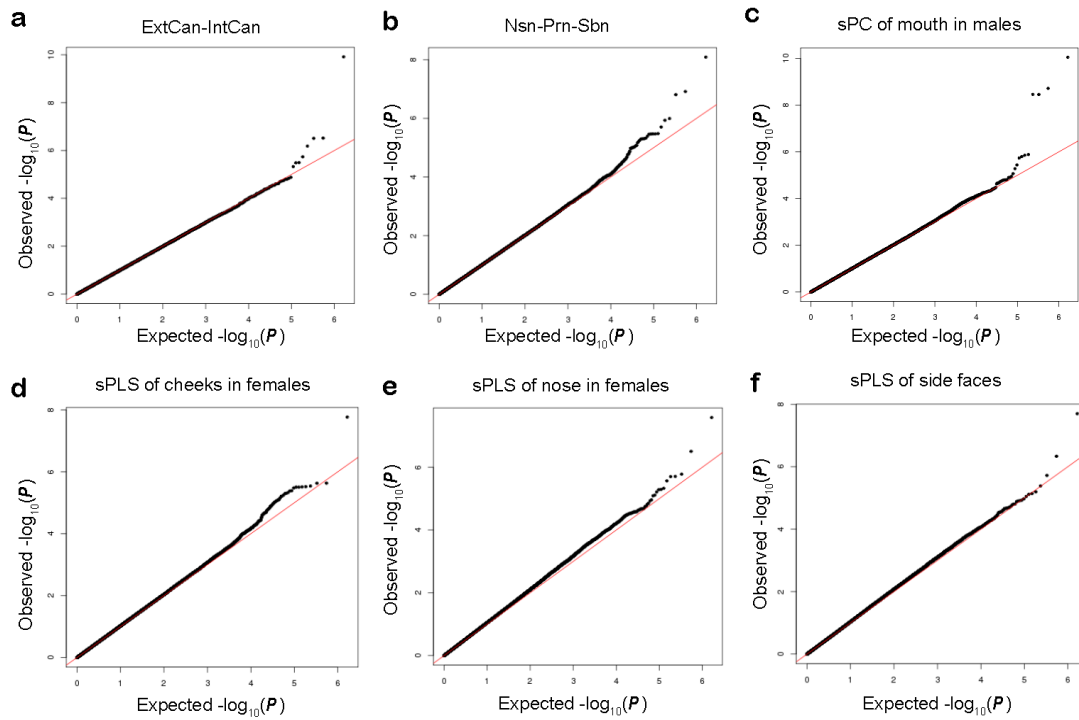

**Supplementary Figure 3 | Q-Q plot of six genome-wide significant SNPs.** (a) rs1868752, (b) rs118078182, (c) rs60159418, (d) rs17868256, (e) rs3920540, (f) rs61672954.

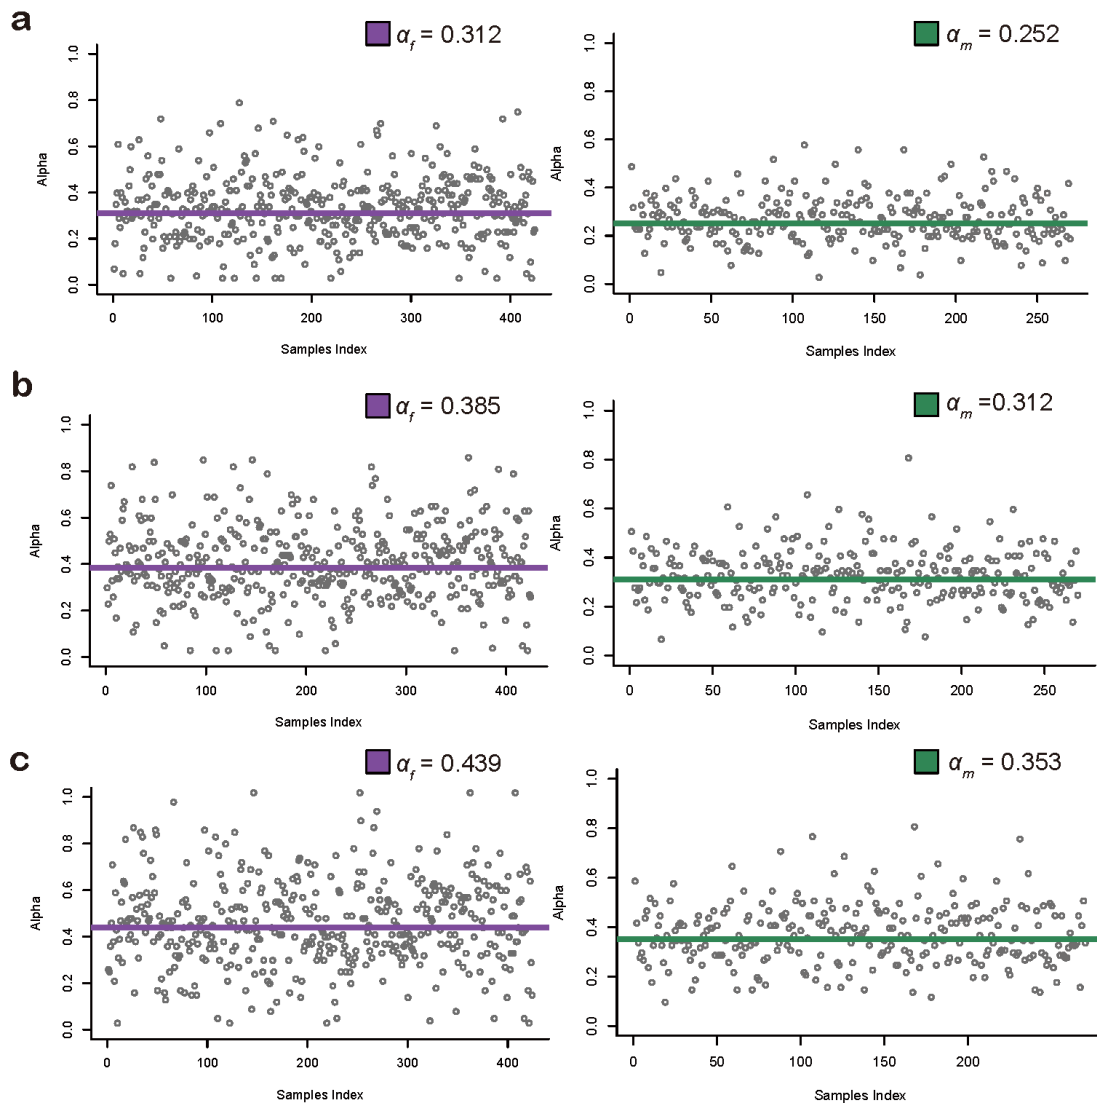

**Supplementary Figure 4 | Global effect coefficient  $\alpha_f$  and  $\alpha_m$  from UIG-D females and UIG-D males.** (a) for 277-top-SNP prediction model. (b) for 240-top-SNP prediction model after trimmed the potential LD by pairwise LD < 0.8. (c) for 209-top-SNP prediction model after trimmed the potential LD by inter-marker physical distance < 400kb. The global factor was averaged by all individual factor (female in plum, male in green).



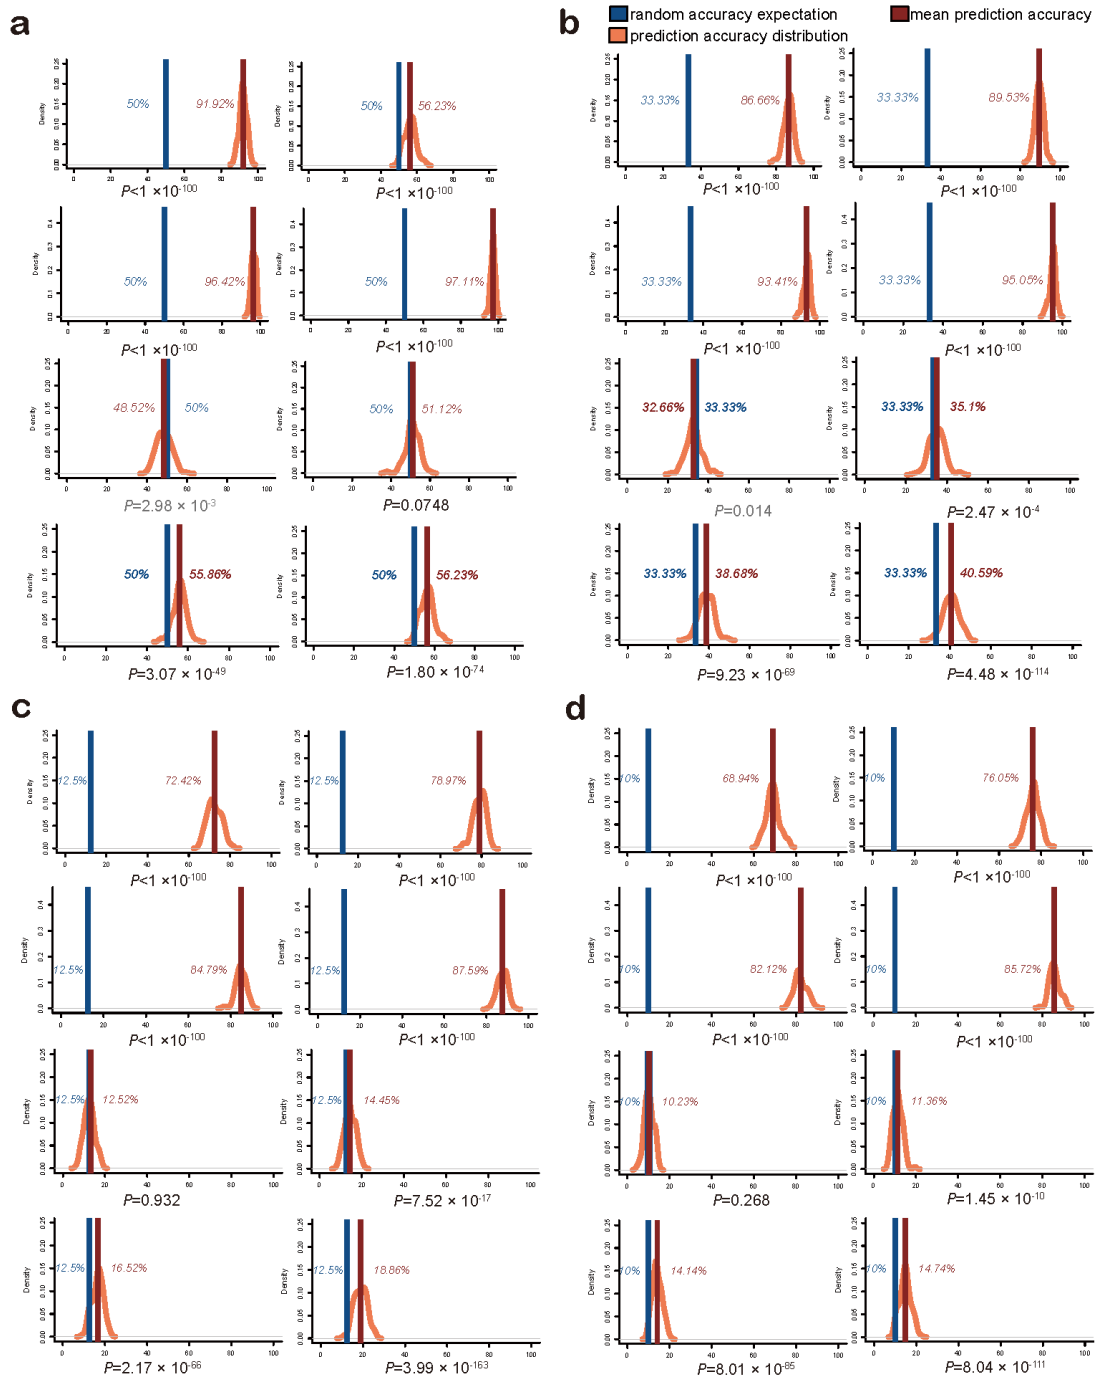

**Supplementary Figure 6 | Evaluation of the face prediction in hypothetical forensic scenarios (2/3/8/10 candidates) using 277-SNP face prediction model.** (a) N=2, (b) N=3, (c) N=8, (d) N=10. In each kind of scenario, the samples from top row to bottom are UIG-D females, UIG-D males, UIG-R females, UIG-R males. For each cohort, the accuracy rates are decided based on PSD (left column) and SSA (right column).  $P$  values in black indicate that the prediction perform significantly better than random draws.

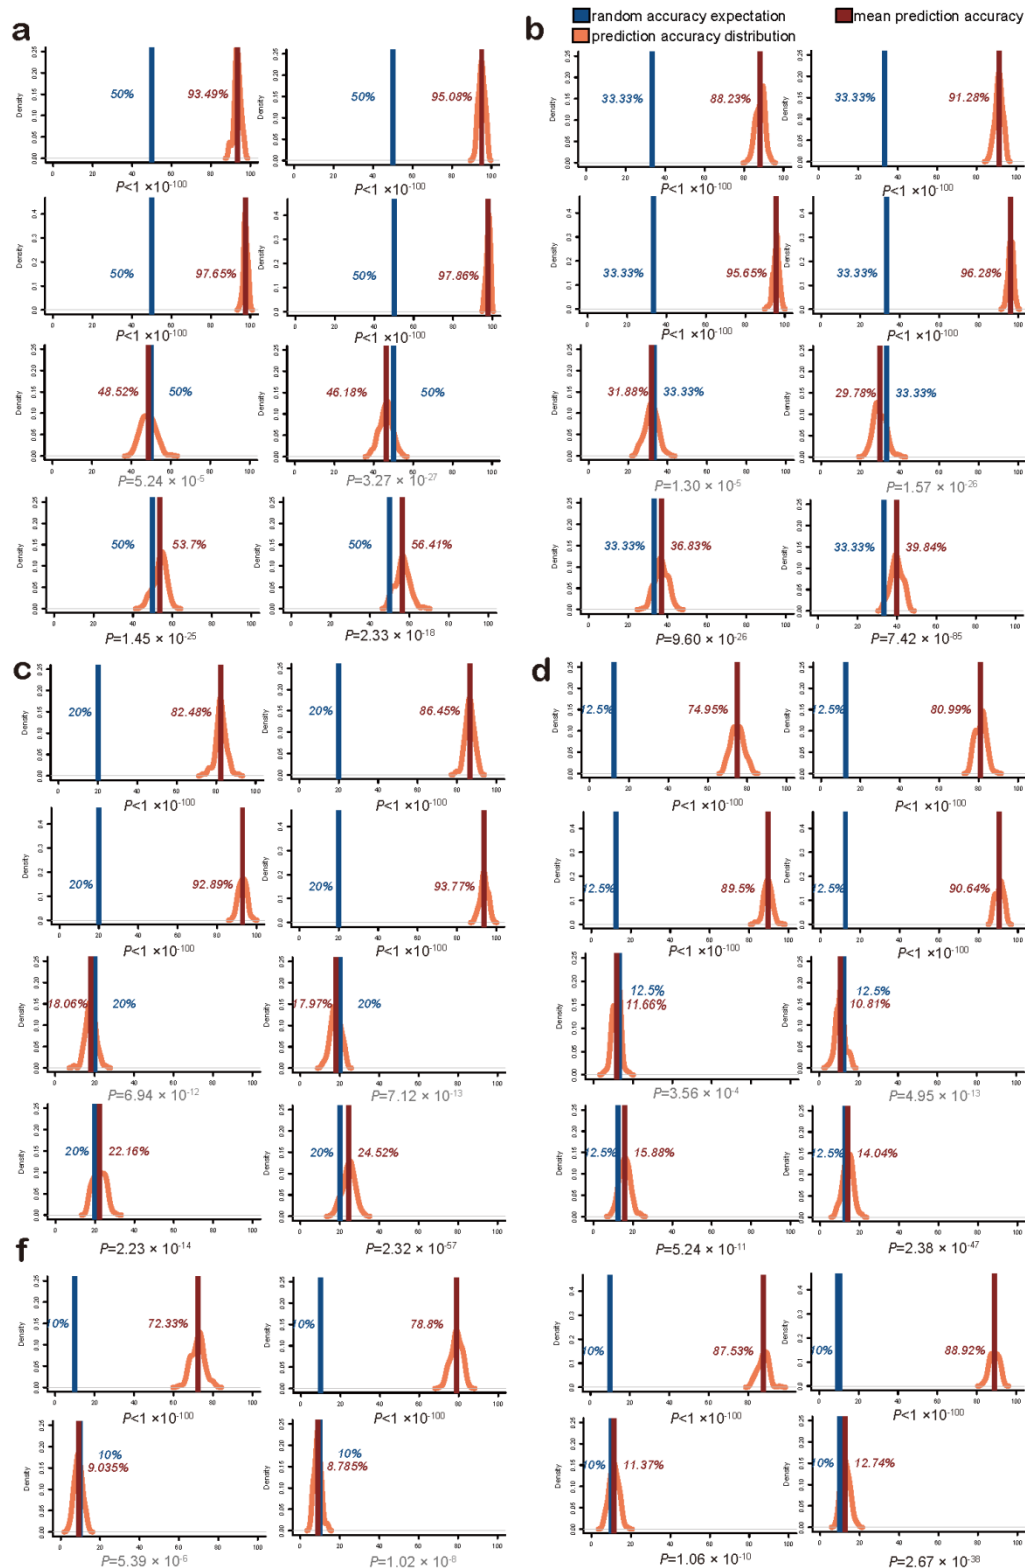

**Supplementary Figure 7 | Evaluation of the face prediction in hypothetical forensic scenarios (2/3/5/8/10 candidates) using 240-SNP face prediction model. (a)  $N=2$ , (b)  $N=3$ , (c)  $N=5$ , (d)  $N=8$ , (e)  $N=10$ . In each kind of scenario, the samples from top row to bottom are UIG-D females, UIG-D males, UIG-R females, UIG-R males. For each cohort, the accuracy rates are decided based on PSD (left column) and SSA (right column).  $P$  values in black indicate that the prediction perform significantly better than random draws.**





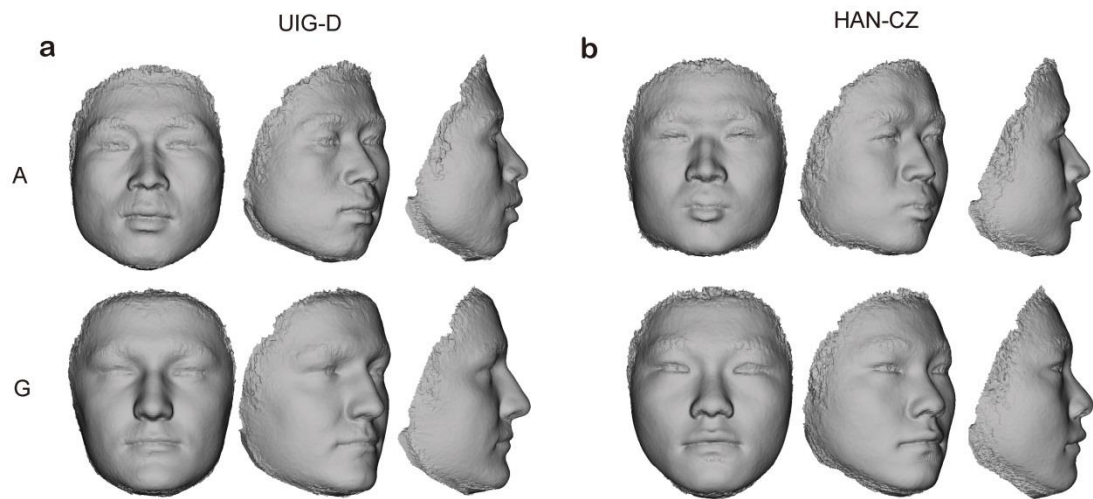

**Supplementary Figure 9 | Extrapolated faces of rs61672954 in discovery and independent cohorts.** (a) in UIG-D males, (b) in HAN-CZ males. We showed the extreme faces based on residual faces with their allele labeled in front. The top extrapolated faces and alleles are corresponding to Han Chinese liked faces. The bottom extrapolations are European liked faces.

**Supplementary Table 1 | Landmark-based phenotypes**

| Landmrk-based phenotypes | P                      |                        |
|--------------------------|------------------------|------------------------|
|                          | Female                 | Male                   |
| LAla-Prn-RAla            | $2.70 \times 10^{-11}$ | $1.52 \times 10^{-21}$ |
| Nsn-Prn-Sbn              | $2.43 \times 10^{-15}$ | $6.71 \times 10^{-23}$ |
| LIntCan-Nsn-RIntCan      | $2.38 \times 10^{-10}$ | $5.27 \times 10^{-27}$ |
| height of Nsn to eyes    | $1.22 \times 10^{-21}$ | $5.50 \times 10^{-47}$ |
| Sbn-ULipP                | $3.28 \times 10^{-8}$  | $2.80 \times 10^{-9}$  |
| LLipCn-RLipCn            | <b>0.00535</b>         | $1.52 \times 10^{-8}$  |
| ULipP-Stm-LLipP          | <b>0.0026</b>          | $7.41 \times 10^{-9}$  |
| ExtCan-IntCan            | $1.46 \times 10^{-7}$  | $2.58 \times 10^{-10}$ |
| LIntCan-RIntCan          | $8.69 \times 10^{-7}$  | $4.31 \times 10^{-9}$  |
| Sbn-ULipP-ChiP           | <b>0.00359</b>         | $6.78 \times 10^{-7}$  |

**Supplementary Table 2 | Eurasian-specified phenotypes**

| Partial Features | Gender <sup>A</sup> | PCA based           |                                | PLS based           |                                |
|------------------|---------------------|---------------------|--------------------------------|---------------------|--------------------------------|
|                  |                     | ncomp. <sup>B</sup> | P <sup>C</sup>                 | ncomp. <sup>B</sup> | P <sup>C</sup>                 |
| brow ridge       | Female              | 2                   | <b>5.80 × 10<sup>-19</sup></b> | 1:6                 | <b>6.41 × 10<sup>-23</sup></b> |
|                  | Male                | 2                   | <b>1.00 × 10<sup>-29</sup></b> | 1:8                 | <b>2.78 × 10<sup>-49</sup></b> |
| eyes             | Female              | 5                   | <b>1.69 × 10<sup>-16</sup></b> | 1:8                 | <b>1.45 × 10<sup>-25</sup></b> |
|                  | Male                | 2                   | <b>8.62 × 10<sup>-17</sup></b> | 1:11                | <b>1.00 × 10<sup>-60</sup></b> |
| side faces       | Female              | 1                   | <b>5.79 × 10<sup>-13</sup></b> | 1:25                | <b>6.48 × 10<sup>-27</sup></b> |
|                  | Male                | 2                   | <b>1.71 × 10<sup>-17</sup></b> | 1:9                 | <b>1.94 × 10<sup>-47</sup></b> |
| cheeks           | Female              | 1                   | <b>4.71 × 10<sup>-15</sup></b> | 1:22                | <b>1.10 × 10<sup>-27</sup></b> |
|                  | Male                | 2                   | <b>5.79 × 10<sup>-21</sup></b> | 1:8                 | <b>4.03 × 10<sup>-43</sup></b> |
| nose             | Female              | 2                   | <b>1.43 × 10<sup>-22</sup></b> | 1:17                | <b>2.94 × 10<sup>-29</sup></b> |
|                  | Male                | 2                   | <b>2.24 × 10<sup>-46</sup></b> | 1:12                | <b>6.09 × 10<sup>-57</sup></b> |
| mouth            | Female              | 4                   | <b>3.41 × 10<sup>-11</sup></b> | 1:20                | <b>1.85 × 10<sup>-24</sup></b> |
|                  | Male                | 2                   | <b>8.73 × 10<sup>-18</sup></b> | 1:15                | <b>1.72 × 10<sup>-48</sup></b> |

<sup>A</sup>sex specified test

<sup>B</sup>Number of components that used to distinguish Han Chinese and European features

<sup>C</sup>Student's test

| <b>Supplementary Table 3   Inflation factor in GWAS</b> |                                |                         |                                         |                                                 |
|---------------------------------------------------------|--------------------------------|-------------------------|-----------------------------------------|-------------------------------------------------|
| <b>SNP</b>                                              | <b>P</b>                       | <b>Inflation factor</b> | <b>genome PC corrected<br/>P values</b> | <b>genome PC corrected<br/>Inflation factor</b> |
| rs1868752                                               | <b>1.22 × 10<sup>-10</sup></b> | 1                       | <b>1.02 × 10<sup>-10</sup></b>          | 1                                               |
| rs118078182                                             | <b>8.19 × 10<sup>-9</sup></b>  | 1.00961                 | <b>1.09 × 10<sup>-8</sup></b>           | 1.01032                                         |
| rs60159418                                              | <b>8.96 × 10<sup>-11</sup></b> | 1.01437                 | <b>1.38 × 10<sup>-9</sup></b>           | 1                                               |
| rs17868256                                              | <b>7.22 × 10<sup>-9</sup></b>  | 1.03422                 | <b>1.20 × 10<sup>-7</sup></b>           | 1.0013                                          |
| rs3920540                                               | <b>3.31 × 10<sup>-8</sup></b>  | 1.06986                 | <b>2.28 × 10<sup>-7</sup></b>           | 1.00707                                         |
| rs61672954                                              | <b>2.00 × 10<sup>-8</sup></b>  | 1.03794                 | <b>1.04 × 10<sup>-7</sup></b>           | 1                                               |

Supplementary Table 4 | Previous candidate SNPs associated with Uyghur facial shape

| SNP        | Chr. | BP <sup>A</sup> | Gene         | Discovered Trait <sup>B</sup>                        | Studied Trait                | P               |                 |                 |
|------------|------|-----------------|--------------|------------------------------------------------------|------------------------------|-----------------|-----------------|-----------------|
|            |      |                 |              |                                                      |                              | Female          | Male            | Mixed           |
| rs4648379  | 1    | 3261516         | PRDM16       | LAla-Prn-RAla                                        | LAla-Prn-RAla                | 0.7133          | 0.172           | 0.2357          |
|            |      |                 |              |                                                      | angle of LAla-Prn-Rala       | 0.2207          | <b>0.02539</b>  | <b>0.02028</b>  |
| rs642961   | 1    | 209989270       | IRF6         | ULipP-Stm-LLipP                                      | ULipP-Stm-LLipP              | <b>0.05197</b>  | 0.778           | 0.2358          |
| rs3827760  | 2    | 109513601       | EDAR         | Chin protrusion                                      | angle of Sbn-ULipP-ChiP      | <b>0.06131</b>  | <b>0.09733</b>  | <b>0.01238</b>  |
| rs7559271  | 2    | 223068286       | PAX3         | Nasion                                               | height of Nasion to eyes     | <b>0.005811</b> | 0.117           | <b>0.001986</b> |
| rs17447439 | 3    | 189549423       | TP63         | EyeR-EyeL                                            | LExtCan-RExtCan              | 0.7631          | 0.4777          | 0.9567          |
| rs2045323  | 4    | 154831899       | DCHS2        | Columella inclination/Nose protrusion/Nose tip angle | height of Prn to Ala         | <b>0.05813</b>  | <b>0.04288</b>  | 0.815           |
| rs6184     | 5    | 42719344        | GHR          | mandibular height (ear-Gn)                           | Ear-ChiP                     | <b>0.0915</b>   | 0.2674          | 0.5894          |
| rs1852985  | 6    | 45329656        | SUPT3H/RUNX2 | Nose bridge breadth                                  | LAla-RAla                    | 0.6941          | 0.1894          | 0.244           |
| rs7773292  | 6    | 132099761       | ENPP1        | upper and lower face height                          | Sbn-UlipP-ChiP               | 0.9239          | 0.9781          | 0.9585          |
| rs17640804 | 7    | 42131390        | GLI3         | Nose wing breadth                                    | LAla-RAla                    | 0.1402          | 0.1242          | <b>0.03421</b>  |
| rs805722   | 10   | 105810400       | COL17A1      | EyeLR-Nsn                                            | LIntCan-Nsn-RExtCan          | 0.4636          | 0.3311          | 0.9475          |
|            |      |                 |              |                                                      | angle of LIntCan-Nsn-RExtCan | <b>0.004021</b> | 0.8374          | <b>0.01856</b>  |
| rs927833   | 20   | 22041577        | PAX1         | Nose wing breadth                                    | LAla-RAla                    | 0.4841          | <b>0.007729</b> | <b>0.02703</b>  |

<sup>A</sup>NCBI build 37

<sup>B</sup>original measurements in previous studies
